# Supplementary material
Source: Royal Society of Chemistry journal article supplement (doi:10.1039/d6ce00068a)
Supplement: d6ce00068a1.pdf [file d6ce00068a1.pdf]

**Electronic supplementary document**

**Crystal Engineering of *p*-sulfocinnamic Acid into Mononuclear Cationic Fe(II), Co(II) and Fe(III) Complexes**

Xiaochun Li,<sup>a</sup> Joanne W. L. Wong,<sup>a</sup> Mengmeng Wang,<sup>a</sup> Youssef Draoui,<sup>a</sup> Mariusz Wolff,<sup>c</sup> Koen Robeyns,<sup>a</sup> Aurelian Rotaru,<sup>b</sup> and Yann Garcia<sup>a,\*</sup>

<sup>a</sup>*Institute of Condensed Matter and Nanosciences, Molecular Chemistry, Materials and Catalysis (IMCN/MOST), Université Catholique de Louvain, Place L. Pasteur 1, 1348 Louvain-la-Neuve, Belgium.*

<sup>b</sup>*Department of Electrical Engineering and Computer Science & Research Center MANSiD, “Stefan cel Mare” University, University Street, No. 13, Suceava 720229, Romania.*

<sup>c</sup>*Institute of Functional Materials and Catalysis, Faculty of Chemistry, Universität Wien, Währinger Straße 38-42, 1090 Wien, Austria; mariusz.jozef.wolff@univie.ac.at*

\* *Corresponding author: [yann.garcia@uclouvain.be](mailto:yann.garcia@uclouvain.be)*

## Content:

### Materials and methods

**Table S1.** Summary of crystallographic data and refinement for  $[\text{Co}(\text{H}_2\text{O})_6](\text{Hpsca})_2 \cdot n\text{H}_2\text{O}$ .

**Table S2.** Summary of crystallographic data and refinement for **1**.

**Table S3.** Summary of crystallographic data and refinement for **2**.

**Table S4.** Summary of crystallographic data and refinement for **3**.

**Table S5.** Summary of crystallographic data and refinement for **4**.

**Table S6.** Selected bond lengths [ $\text{\AA}$ ] and angles [ $^\circ$ ] for  $[\text{Co}(\text{H}_2\text{O})_6](\text{Hpsca})_2 \cdot n\text{H}_2\text{O}$  and compounds **1-4**.

**Table S7.** Alignments of  $\text{Hpsca}^-$  counter anion in the crystal lattice and related geometric parameters relevant to solid-state photoreactivity across all the complexes ( $d_1$  is defined by the distance between the parallel C=C bonds.  $\theta_1$  denotes the angle formed between two adjacent C=C bonds in the top view.  $\theta_2$  is defined by the angle involving the C=C bond and one of the carbon atoms from the adjacent C=C bond. The blue and green planes for  $\theta_3$  are defined by the two C=C bonds and their related single bond).

**Figure S1.** Powder X-ray diffraction (PXRD) pattern of complexes **1**, **2** and **4** compared with the simulated pattern calculated from single-crystal X-ray diffraction (SCXRD) data.

**Figure S2.** Hydrogen bonds around the  $[\text{Co}(\text{H}_2\text{O})_6]^{2+}$  ion (a) and  $\text{Hpsca}^-$  anion (b) at r.t.

**Figure S3.** Crystal packing of  $[\text{Co}(\text{H}_2\text{O})_6](\text{Hpsca})_2 \cdot 2\text{H}_2\text{O}$  along the  $a$  axis at r.t.

**Figure S4.** Crystal packing of  $[\text{Co}(\text{H}_2\text{O})_6](\text{Hpsca})_2 \cdot 2\text{H}_2\text{O}$  along the  $b$  axis at r.t.

**Figure S5.** Crystal packing of  $[\text{Co}(\text{H}_2\text{O})_6](\text{Hpsca})_2 \cdot 2\text{H}_2\text{O}$  along the  $c$  axis at r.t.

**Figure S6.** Crystal packing of  $[\text{Co}(\text{H}_2\text{O})_6](\text{Hpsca})_2 \cdot 4\text{H}_2\text{O}$  along the  $a$  axis at 150 K.

**Figure S7.** Crystal packing of  $[\text{Co}(\text{H}_2\text{O})_6](\text{Hpsca})_2 \cdot 4\text{H}_2\text{O}$  along the  $b$  axis at 150 K.

**Figure S8.** Crystal packing of  $[\text{Co}(\text{H}_2\text{O})_6](\text{Hpsca})_2 \cdot 4\text{H}_2\text{O}$  along the  $c$  axis at 150 K.

**Figure S9.** Hydrogen bonds around the  $[\text{Co}(\text{H}_2\text{O})_6]^{2+}$  ion in  $[\text{Co}(\text{H}_2\text{O})_6](\text{Hpsca})_2 \cdot 4\text{H}_2\text{O}$  at 150 K.

**Figure S10.** Crystal packing of  $[\text{Co}(\text{H}_2\text{O})_6](\text{Hpsca})_2 \cdot 4\text{H}_2\text{O}$  after irradiation along the  $a$  axis at r.t.

**Figure S11.** Crystal packing of  $[\text{Co}(\text{H}_2\text{O})_6](\text{Hpsca})_2 \cdot 4\text{H}_2\text{O}$  after irradiation along the  $b$  axis at r.t.

**Figure S12.** Crystal packing of  $[\text{Co}(\text{H}_2\text{O})_6](\text{Hpsca})_2 \cdot 4\text{H}_2\text{O}$  after irradiation along the  $c$  axis at r.t.

**Figure S13.** PXRD of  $[\text{Co}(\text{H}_2\text{O})_6](\text{Hpsca})_2 \cdot 4\text{H}_2\text{O}$  before and after photoirradiation.

**Figure S14.** FTIR spectra of  $[\text{Co}(\text{H}_2\text{O})_6](\text{Hpsca})_2 \cdot 4\text{H}_2\text{O}$  after various hours of photoirradiation.

**Figure S15.** FTIR spectra of *trans*-cinnamic acid irradiated with UV light after 2 and 4 h illustrating the disappearance of the olefinic C=C bond at  $1630\text{ cm}^{-1}$ .

**Figure S16.** Crystal packing of  $[\text{Fe}(\text{bipy})_3](\text{Hpsca})_2 \cdot 2\text{MeOH}$  along the  $a$  axis at r.t.

**Figure S17.** Crystal packing of  $[\text{Fe}(\text{bipy})_3](\text{Hpsca})_2 \cdot 2\text{MeOH}$  along the  $b$  axis at r.t.

**Figure S18.** Crystal packing of  $[\text{Fe}(\text{bipy})_3](\text{Hpsca})_2 \cdot 2\text{MeOH}$  along the  $c$  axis at r.t.

**Figure S19.**  $^1\text{H}$  NMR of **1**.

**Figure S20.** Crystal packing of  $[\text{Co}(\text{bipy})_3](\text{Hpsca})_2 \cdot 2\text{MeOH}$  along the  $a$  axis at 100 K.

**Figure S21.** Crystal packing of  $[\text{Co}(\text{bipy})_3](\text{Hpsca})_2 \cdot 2\text{MeOH}$  along the  $b$  axis at 100 K.

**Figure S22.** Crystal packing of  $[\text{Co}(\text{bipy})_3](\text{Hpsca})_2 \cdot 2\text{MeOH}$  along the  $c$  axis at 100 K.

**Figure S23.** Crystal packing of  $[\text{Co}(\text{bipy})_3](\text{Hpsca})_2 \cdot 1.26\text{MeOH}$  along the  $a$  axis at r.t.

**Figure S24.** Crystal packing of  $[\text{Co}(\text{bipy})_3](\text{Hpsca})_2 \cdot 1.26\text{MeOH}$  along the  $b$  axis at r.t.

**Figure S25.** Crystal packing of  $[\text{Co}(\text{bipy})_3](\text{Hpsca})_2 \cdot 1.26\text{MeOH}$  along the  $c$  axis at r.t.

**Figure S26.** Crystal packing of  $[\text{Fe}(\text{1-bpp})(\text{Hpsca})(\text{H}_2\text{O})(\text{MeOH})]\text{Hpsca} \cdot \text{MeOH}$  along the  $a$  axis at 100 K.

**Figure S27.** Crystal packing of  $[\text{Fe}(\text{1-bpp})(\text{Hpsca})(\text{H}_2\text{O})(\text{MeOH})]\text{Hpsca} \cdot \text{MeOH}$  along the  $b$  axis at 100 K.

**Figure S28.** Crystal packing of  $[\text{Fe}(\text{1-bpp})(\text{Hpsca})(\text{H}_2\text{O})(\text{MeOH})]\text{Hpsca} \cdot \text{MeOH}$  along the  $c$  axis at 100 K.

**Figure S29.** Crystal packing of  $[\text{Fe}(\text{3,2,3-sal}_2\text{tet})]\text{Hpsca} \cdot \text{H}_2\text{O}$  along the  $a$  axis at 100 K.

**Figure S30.** Crystal packing of  $[\text{Fe}(\text{3,2,3-sal}_2\text{tet})]\text{Hpsca} \cdot \text{H}_2\text{O}$  along the  $b$  axis at 100 K.

**Figure S31.** Crystal packing of  $[\text{Fe}(\text{3,2,3-sal}_2\text{tet})]\text{Hpsca} \cdot \text{H}_2\text{O}$  along the  $c$  axis at 100 K.

**Figure S32.** TGA curves of complexes **1**, **2** and **4**.

**Figure S33.**  $^{57}\text{Fe}$  Mössbauer spectrum of  $[\text{Fe}(\text{H}_2\text{O})_6](\text{Hpsca})_2 \cdot 2\text{H}_2\text{O}$  recorded at 298 K. The signal in red stands for HS Fe(II) ions and in yellow for HS Fe(III) ions.

**Figure S34.** HRMS of **1**.

**Figure S35.** HRMS of **2**.

**Figure S36.** HRMS of **4**.

## Materials and methods

All chemicals were bought from usual chemical companies and used as received without further purification. Solvents were degassed by standard procedures before use. Powder X-ray diffraction (PXRD) measurements were carried out at room temperature on a Bruker D8 ADVANCE X-ray diffractometer with Cu K $\alpha$  radiation ( $\lambda = 1.5148 \text{ \AA}$ ). Thermogravimetric analyses (TGAs) were carried out by Mettler Toledo TGA/SDTA 851e analyzer in N<sub>2(g)</sub> (100 mL min<sup>-1</sup>) at a heating rate of 10 °C min<sup>-1</sup> between 25 °C and 600 °C. Fourier transformed infrared (FT-IR) spectra were recorded by an Equinox 55 (Bruker) equipped with an ATR modulus and an MCT detector. HRMS spectra of compounds **1**, **2** (Figures S1, S2) were recorded in electrospray ionization mode using a ThermoFisher Q-Exactive instrument. HRMS spectrum of compound **4** (Figure S3) was obtained by direct infusion on a Orbitrap Exploris™ 120 mass spectrometer MB11205C (Thermo Fisher Scientific™, from Waltham, Massachusetts, USA) and/or a maXis QTOF-MS (Bruker Daltonics GmbH, Bremen, Germany). The measurement was performed using Orbitrap Exploris 120 Tune Application and Bruker Compass DataAnalysis software. The sum formulas of the detected ions were determined using FreeStyle™ 1.8 SP2 QF1, Modern Data Visualization Software, based on the mass accuracy ( $\Delta m/z \leq 5 \text{ ppm}$ ) and isotopic pattern matching (SmartFormula algorithm).

Single crystal X-ray diffraction data for [Co(H<sub>2</sub>O)<sub>6</sub>](Hpsca)<sub>2</sub>·2H<sub>2</sub>O, [Co(H<sub>2</sub>O)<sub>6</sub>](Hpsca)<sub>2</sub>·4H<sub>2</sub>O and [Co(H<sub>2</sub>O)<sub>6</sub>](Hpsca)<sub>2</sub>·4H<sub>2</sub>O (Irradiated) were collected on a Mar345 image plate detector using MoK $\alpha$  radiation ( $\lambda = 0.71073 \text{ \AA}$ ) generated by a Rigaku Ultra X18S rotating anode with Xenocs Fox3D mirrors. Single crystal X-ray diffraction data for **1**, **2**, [Co(bipy)<sub>3</sub>](Hpsca)<sub>2</sub>·1.26MeOH, **3** and **4** were collected on a Rigaku Oxford Diffraction SuperNova dual-source (Cu at zero operation) diffractometer equipped with an Atlas CCD detector, using  $\omega$  scans with MoK $\alpha$  radiation ( $\lambda = 0.71073 \text{ \AA}$ ). Single crystal X-ray diffraction data for **1** and [Co(bipy)<sub>3</sub>](Hpsca)<sub>2</sub>·1.26MeOH were collected at room temperature, whereas **2-4** were collected at 100 K.

Crystallographic data and selected bond lengths and angles are summarized in Tables S1-S6 of the Electronic supplementary information. CCDC 2471352-2471355 and 2517053-2517056 contain the supplementary crystallographic data for the compounds reported in this paper. These data can be obtained free of charge from the Cambridge Crystallographic Data Centre via

[www.ccdc.cam.ac.uk/data\\_request/cif](http://www.ccdc.cam.ac.uk/data_request/cif).  $^{57}\text{Fe}$  Mössbauer spectra of **1** and **4** were recorded at room temperature in transmission geometry using a conventional Wissel Mössbauer spectrometer operated in constant acceleration mode. The spectrometer was equipped with a  $^{57}\text{Co}(\text{Rh})$  radioactive source, a Reuter Stokes proportional counter detector and a CMCA-550 multichannel analyzer. All isomer shifts in Mössbauer spectra are given with respect to  $\alpha\text{-Fe}$ . Magnetic susceptibility measurements were carried out using a Quantum Design MPMS-5s SQUID magnetometer. Photoirradiation experiments were conducted using a 60W Philips lamp.

**Table S1.** Summary of crystallographic data and refinement for [Co(H<sub>2</sub>O)<sub>6</sub>](Hpsca)<sub>2</sub>·nH<sub>2</sub>O.

|                                                        | [Co(H <sub>2</sub> O) <sub>6</sub> ](Hpsca) <sub>2</sub> ·4H <sub>2</sub> O | [Co(H <sub>2</sub> O) <sub>6</sub> ](Hpsca) <sub>2</sub> ·4H <sub>2</sub> O<br>(Irradiated) | [Co(H <sub>2</sub> O) <sub>6</sub> ](Hpsca) <sub>2</sub> ·2H <sub>2</sub> O |
|--------------------------------------------------------|-----------------------------------------------------------------------------|---------------------------------------------------------------------------------------------|-----------------------------------------------------------------------------|
| Empirical formula                                      | C <sub>18</sub> H <sub>34</sub> CoO <sub>20</sub> S <sub>2</sub>            | C <sub>18</sub> H <sub>34</sub> CoO <sub>20</sub> S <sub>2</sub>                            | C <sub>18</sub> H <sub>30</sub> CoO <sub>18</sub> S <sub>2</sub>            |
| Formula weight                                         | 693.50                                                                      | 693.50                                                                                      | 657.47                                                                      |
| T [K]                                                  | 150(2)                                                                      | 297(2)                                                                                      | 297(2)                                                                      |
| Wavelength [Å]                                         | 0.71073                                                                     | 0.71073                                                                                     | 0.71073                                                                     |
| Crystal system                                         | Triclinic                                                                   | Triclinic                                                                                   | Triclinic                                                                   |
| Space group                                            | <i>P</i> -1                                                                 | <i>P</i> -1                                                                                 | <i>P</i> -1                                                                 |
| <i>a</i> [Å]                                           | 6.2135(9)                                                                   | 6.31344(20)                                                                                 | 6.512(3)                                                                    |
| <i>b</i> [Å]                                           | 7.5160(5)                                                                   | 7.5814(3)                                                                                   | 6.536(3)                                                                    |
| <i>c</i> [Å]                                           | 14.987(2)                                                                   | 30.1365(13)                                                                                 | 18.147(9)                                                                   |
| $\alpha$ [°]                                           | 84.066(9)                                                                   | 93.468(4)                                                                                   | 81.02(4)                                                                    |
| $\beta$ [°]                                            | 82.739(11)                                                                  | 95.138(3)                                                                                   | 88.71(4)                                                                    |
| $\gamma$ [°]                                           | 81.653(9)                                                                   | 98.427(3)                                                                                   | 64.85(5)                                                                    |
| Volume [Å <sup>3</sup> ]                               | 684.35(14)                                                                  | 1417.20(10)                                                                                 | 689.7(6)                                                                    |
| <i>Z</i>                                               | 1                                                                           | 2                                                                                           | 1                                                                           |
| $\rho_{\text{calc}}$ (g/cm <sup>3</sup> )              | 1.683                                                                       | 1.625                                                                                       | 1.583                                                                       |
| $\mu$ (mm <sup>-1</sup> )                              | 0.870                                                                       | 0.840                                                                                       | 0.853                                                                       |
| <i>F</i> (000)                                         | 361                                                                         | 722                                                                                         | 341                                                                         |
| Crystal size (mm <sup>3</sup> )                        | 0.50 x 0.50 x 0.08                                                          | 0.50x 0.38 x 0.08                                                                           | 0.30x 0.24 x 0.07                                                           |
| Theta range for data collection [°]                    | 3.179 to 26.292                                                             | 2.722 to 26.646                                                                             | 3.414 to 25.816                                                             |
| Reflections collected                                  | 9264                                                                        | 16337                                                                                       | 6389                                                                        |
| Data / restraints / parameters                         | 2747 / 0 / 264                                                              | 5664 / 0 / 435                                                                              | 6389 / 252 / 325                                                            |
| Goodness-of-fit on <i>F</i> <sup>2</sup>               | 1.092                                                                       | 1.059                                                                                       | 1.079                                                                       |
| Final <i>R</i> indices [ <i>I</i> >2sigma( <i>I</i> )] | <i>R</i> <sub>1</sub> = 0.0306,<br><i>wR</i> <sub>2</sub> = 0.0740          | <i>R</i> <sub>1</sub> = 0.0409,<br><i>wR</i> <sub>2</sub> = 0.1154                          | <i>R</i> <sub>1</sub> = 0.0726,<br><i>wR</i> <sub>2</sub> = 0.2009          |
| indices (all data) <i>R</i>                            | <i>R</i> <sub>1</sub> = 0.0316,<br><i>wR</i> <sub>2</sub> = 0.0745          | <i>R</i> <sub>1</sub> = 0.0460,<br><i>wR</i> <sub>2</sub> = 0.1266                          | <i>R</i> <sub>1</sub> = 0.0769,<br><i>wR</i> <sub>2</sub> = 0.2046          |
| CCDC                                                   | 2471352                                                                     | 2517055                                                                                     | 2517053                                                                     |

**Table S2.** Summary of crystallographic data and refinement for **1**.

|                                                        | [Fe(bipy) <sub>3</sub> ](Hpsca) <sub>2</sub> ·1.8MeOH                                    |
|--------------------------------------------------------|------------------------------------------------------------------------------------------|
| Empirical formula                                      | C <sub>49.80</sub> H <sub>45.09</sub> FeN <sub>6</sub> O <sub>11.80</sub> S <sub>2</sub> |
| Formula weight                                         | 1035.58                                                                                  |
| T [K]                                                  | 297(2)                                                                                   |
| Wavelength [Å]                                         | 0.71073                                                                                  |
| Crystal system                                         | Monoclinic                                                                               |
| Space group                                            | C2/c                                                                                     |
| <i>a</i> [Å]                                           | 22.629(6)                                                                                |
| <i>b</i> [Å]                                           | 12.037(2)                                                                                |
| <i>c</i> [Å]                                           | 18.248(5)                                                                                |
| $\alpha$ [°]                                           | 90                                                                                       |
| $\beta$ [°]                                            | 101.81(3)                                                                                |
| $\gamma$ [°]                                           | 90                                                                                       |
| Volume [Å <sup>3</sup> ]                               | 4865(2)                                                                                  |
| <i>Z</i>                                               | 4                                                                                        |
| $\rho_{\text{calc}}$ (g/cm <sup>3</sup> )              | 1.415                                                                                    |
| $\mu$ (mm <sup>-1</sup> )                              | 0.465                                                                                    |
| <i>F</i> (000)                                         | 2154                                                                                     |
| Crystal size (mm <sup>3</sup> )                        | 0.50 x 0.09 x 0.08                                                                       |
| Theta range for data collection [°]                    | 2.838 to 25.243                                                                          |
| Reflections collected                                  | 10401                                                                                    |
| Data / restraints / parameters                         | 4338 / 36 / 371                                                                          |
| Goodness-of-fit on <i>F</i> <sup>2</sup>               | 1.082                                                                                    |
| Final <i>R</i> indices [ <i>I</i> >2sigma( <i>I</i> )] | <i>R</i> <sub>1</sub> = 0.0685,<br>w <i>R</i> <sub>2</sub> = 0.1699                      |
| indices (all data) <i>R</i>                            | <i>R</i> <sub>1</sub> = 0.0834,<br>w <i>R</i> <sub>2</sub> = 0.1816                      |
| CCDC                                                   | 2471355                                                                                  |

**Table S3.** Summary of crystallographic data and refinement for **2**.

|                                                 | [Co(bipy) <sub>3</sub> ](Hpsca) <sub>2</sub> ·2MeOH                             | [Co(bipy) <sub>3</sub> ](Hpsca) <sub>2</sub> ·1.26MeOH                                   |
|-------------------------------------------------|---------------------------------------------------------------------------------|------------------------------------------------------------------------------------------|
| Empirical formula                               | C <sub>50</sub> H <sub>46</sub> CoN <sub>6</sub> O <sub>12</sub> S <sub>2</sub> | C <sub>49.26</sub> H <sub>43.03</sub> CoN <sub>6</sub> O <sub>11.26</sub> S <sub>2</sub> |
| Formula weight                                  | 1045.98                                                                         | 1022.18                                                                                  |
| T [K]                                           | 100(2)                                                                          | 297(2)                                                                                   |
| Wavelength [Å]                                  | 0.71073                                                                         | 0.71073                                                                                  |
| Crystal system                                  | Monoclinic                                                                      | Monoclinic                                                                               |
| Space group                                     | <i>C2/c</i>                                                                     | <i>C2/c</i>                                                                              |
| <i>a</i> [Å]                                    | 22.1092(9)                                                                      | 22.388(3)                                                                                |
| <i>b</i> [Å]                                    | 12.0224(4)                                                                      | 12.0378(8)                                                                               |
| <i>c</i> [Å]                                    | 18.1003(6)                                                                      | 18.003(3)                                                                                |
| $\alpha$ [°]                                    | 90°                                                                             | 90                                                                                       |
| $\beta$ [°]                                     | 99.191(4)                                                                       | 101.438(15)                                                                              |
| $\gamma$ [°]                                    | 90°                                                                             | 90                                                                                       |
| Volume [Å <sup>3</sup> ]                        | 4749.4(3)                                                                       | 4755.6(10)                                                                               |
| <i>Z</i>                                        | 4                                                                               | 4                                                                                        |
| $\rho_{\text{calc}}$ (g/cm <sup>3</sup> )       | 1.463                                                                           | 1.428                                                                                    |
| $\mu$ (mm <sup>-1</sup> )                       | 0.521                                                                           | 0.517                                                                                    |
| <i>F</i> (000)                                  | 2172                                                                            | 2119                                                                                     |
| Crystal size (mm <sup>3</sup> )                 | 0.50 x 0.25 x 0.18                                                              | 0.20 x 0.10 x 0.10                                                                       |
| Theta range for data collection [°]             | 2.874 to 26.463                                                                 | 2.341 to 25.423                                                                          |
| Reflections collected                           | 16947                                                                           | 9538                                                                                     |
| Data / restraints / parameters                  | 4828 / 0 / 325                                                                  | 4364 / 133 / 459                                                                         |
| Goodness-of-fit on <i>F</i> <sup>2</sup>        | 1.075                                                                           | 1.098                                                                                    |
| Final R indices [ <i>I</i> >2sigma( <i>I</i> )] | R <sub>1</sub> = 0.0316,<br>wR <sub>2</sub> = 0.0849                            | R <sub>1</sub> = 0.0684,<br>wR <sub>2</sub> = 0.1686                                     |
| indices (all data) <i>R</i>                     | R <sub>1</sub> = 0.0359,<br>wR <sub>2</sub> = 0.0863                            | R <sub>1</sub> = 0.0835,<br>wR <sub>2</sub> = 0.1788                                     |
| CCDC                                            | 2517054                                                                         | 2471354                                                                                  |

**Table S4.** Summary of crystallographic data and refinement for **3**.

|                                                      | [Fe(1-bpp)(Hpsca)(H <sub>2</sub> O)(MeOH)]Hpsca·MeOH                            |
|------------------------------------------------------|---------------------------------------------------------------------------------|
| Empirical formula                                    | C <sub>31</sub> H <sub>33</sub> FeN <sub>5</sub> O <sub>13</sub> S <sub>2</sub> |
| Formula weight                                       | 803.59                                                                          |
| Temperature [K]                                      | 100(2)                                                                          |
| Wavelength [Å]                                       | 0.71073                                                                         |
| Crystal system                                       | Triclinic                                                                       |
| Space group                                          | <i>P</i> -1                                                                     |
| <i>a</i> [Å]                                         | 8.10565(14)                                                                     |
| <i>b</i> [Å]                                         | 8.25059(19)                                                                     |
| <i>c</i> [Å]                                         | 33.4784(8)                                                                      |
| $\alpha$ [°]                                         | 90.6588(19)                                                                     |
| $\beta$ [°]                                          | 90.3372(17)                                                                     |
| $\gamma$ [°]                                         | 97.2798(17)                                                                     |
| Volume [Å <sup>3</sup> ]                             | 2220.66(8)                                                                      |
| <i>Z</i>                                             | 2                                                                               |
| $\rho_{\text{calc}}$ (g/cm <sup>3</sup> )            | 1.202                                                                           |
| $\mu$ (mm <sup>-1</sup> )                            | 0.491                                                                           |
| <i>F</i> (000)                                       | 832                                                                             |
| Crystal size (mm <sup>3</sup> )                      | 0.40x 0.28 x 0.20                                                               |
| Theta range for data collection [°]                  | 2.533 to 26.179                                                                 |
| Reflections collected                                | 18237                                                                           |
| Data / restraints / parameters                       | 8627 / 3 / 488                                                                  |
| Goodness-of-fit on <i>F</i> <sup>2</sup>             | 1.091                                                                           |
| Final R indices [ <i>I</i> >2 $\sigma$ ( <i>I</i> )] | R <sub>1</sub> = 0.0683,<br>wR <sub>2</sub> = 0.1802                            |
| indices (all data) <i>R</i>                          | R <sub>1</sub> = 0.0715,<br>wR <sub>2</sub> = 0.1820                            |
| CCDC                                                 | 2517056                                                                         |

**Table S5.** Summary of crystallographic data and refinement for **4**.

|                                                 | [Fe(3,2,3-sal <sub>2</sub> tet)]Hpsca·H <sub>2</sub> O            |
|-------------------------------------------------|-------------------------------------------------------------------|
| Empirical formula                               | C <sub>31</sub> H <sub>35</sub> FeN <sub>4</sub> O <sub>7</sub> S |
| Formula weight                                  | 663.54                                                            |
| T [K]                                           | 100(2)                                                            |
| Wavelength [Å]                                  | 0.81490                                                           |
| Crystal system                                  | Monoclinic                                                        |
| Space group                                     | <i>P2<sub>1</sub>/n</i>                                           |
| <i>a</i> [Å]                                    | 7.77903(18)                                                       |
| <i>b</i> [Å]                                    | 19.1459(5)                                                        |
| <i>c</i> [Å]                                    | 23.0014(5)                                                        |
| $\alpha$ [°]                                    | 90                                                                |
| $\beta$ [°]                                     | 94.621(2)                                                         |
| $\gamma$ [°]                                    | 90                                                                |
| Volume [Å <sup>3</sup> ]                        | 3414.63(14)                                                       |
| <i>Z</i>                                        | 4                                                                 |
| $\rho_{\text{calc}}$ (g/cm <sup>3</sup> )       | 1.291                                                             |
| $\mu$ (mm <sup>-1</sup> )                       | 0.551                                                             |
| <i>F</i> (000)                                  | 1388                                                              |
| Crystal size (mm <sup>3</sup> )                 | 0.45 x 0.18 x 0.05                                                |
| Theta range for data collection [°]             | 2.772 to 26.615                                                   |
| Reflections collected                           | 24187                                                             |
| Data / restraints / parameters                  | 6887/0/402                                                        |
| Goodness-of-fit on <i>F</i> <sup>2</sup>        | 1.061                                                             |
| Final R indices [ <i>I</i> >2sigma( <i>I</i> )] | R <sub>1</sub> =0.0361, wR <sub>2</sub> = 0.0986                  |
| indices (all data) <i>R</i>                     | R <sub>1</sub> =0.0396, wR <sub>2</sub> = 0.1046                  |
| CCDC                                            | 2471353                                                           |

**Table S6.** Selected bond lengths [Å] and angles [°] for [Co(H<sub>2</sub>O)<sub>6</sub>](Hpsca)<sub>2</sub>·nH<sub>2</sub>O and compounds **1-4**.

| Compound                                                                                           | Bond lengths [Å] |            | Bond angles [°] |            |
|----------------------------------------------------------------------------------------------------|------------------|------------|-----------------|------------|
| [Co(H <sub>2</sub> O) <sub>6</sub> ](Hpsca) <sub>2</sub> ·4H <sub>2</sub> O (150 K)                | Co1-O3           | 2.0592(12) | O3-Co1-O3       | 180.0      |
|                                                                                                    | Co1-O4           | 2.0720(12) | O3-Co1-O4       | 90.45(5)   |
|                                                                                                    | Co1-O2           | 2.0927(12) | O3-Co1-O4       | 89.55(5)   |
|                                                                                                    | S11-O14          | 1.4416(12) | O3-Co1-O4       | 89.55(5)   |
|                                                                                                    | S11-O13          | 1.4458(12) | O3-Co1-O4       | 90.45(5)   |
|                                                                                                    | S11-O12          | 1.4704(12) | O4-Co1-O4       | 180.00(6)  |
| [Co(H <sub>2</sub> O) <sub>6</sub> ](Hpsca) <sub>2</sub> ·4H <sub>2</sub> O<br>(Irradiated, 297 K) | Co1-O3           | 2.0766(17) | O3-Co1-O3       | 180.0      |
|                                                                                                    | Co1-O4           | 2.1029(15) | O3-Co1-O4       | 91.26(7)   |
|                                                                                                    | Co1-O2           | 2.0818(15) | O3-Co1-O4       | 88.74(7)   |
|                                                                                                    | S11-O13          | 1.4503(15) | O3-Co1-O4       | 88.75(7)   |
|                                                                                                    | S11-O14          | 1.4491(16) | O3-Co1-O4       | 88.74(7)   |
|                                                                                                    | S11-O12          | 1.4700(15) | O4-Co1-O4       | 180.0      |
| [Co(H <sub>2</sub> O) <sub>6</sub> ](Hpsca) <sub>2</sub> ·2H <sub>2</sub> O (297 K)                | Co1-O3           | 2.053(5)   | O3-Co1-O3       | 180.0(4)   |
|                                                                                                    | Co1-O4           | 2.084(6)   | O3-Co1-O4       | 91.5(3)    |
|                                                                                                    | Co1-O2           | 2.094(5)   | O3-Co1-O4       | 88.5(3)    |
|                                                                                                    | S11-O13          | 1.450(9)   | O3-Co1-O4       | 88.5(3)    |
|                                                                                                    | S11-O14          | 1.451(9)   | O3-Co1-O4       | 91.5(3)    |
|                                                                                                    | S11-O12          | 1.482(9)   | O4-Co1-O4       | 180.0      |
| <b>1</b> (297 K)                                                                                   | Fe1-N13          | 1.970(3)   | N13-Fe1-N13     | 173.50(17) |
|                                                                                                    | Fe1-N13          | 1.970(3)   | N13-Fe1-N2      | 94.07(12)  |
|                                                                                                    | Fe1-N2           | 1.972(3)   | N13-Fe1-N2      | 81.27(13)  |
|                                                                                                    | Fe1-N2           | 1.972(3)   | N13-Fe1-N2      | 81.27(12)  |
|                                                                                                    | Fe1-N14          | 1.973(3)   | N2-Fe1-N2       | 89.21(18)  |
|                                                                                                    | Fe1-N14          | 1.973(3)   | N13-Fe1-N14     | 97.33(12)  |
| <b>2</b> (100 K)                                                                                   | Co1-N2           | 2.1232(13) | N2-Co1-N2       | 91.10(7)   |
|                                                                                                    | Co1-N2           | 2.1232(13) | N2-Co1-N14      | 172.65(5)  |
|                                                                                                    | Co1-N14          | 2.1243(13) | N2-Co1-N14      | 96.24(5)   |
|                                                                                                    | Co1-N14          | 2.1244(13) | N14-Co1-N14     | 76.41(7)   |
|                                                                                                    | Co1-N9           | 2.1321(14) | N2-Co1-N9       | 94.29(5)   |
|                                                                                                    | Co1-N9           | 2.1321(14) | N14-Co1-N9      | 101.99(5)  |
| [Co(bipy) <sub>3</sub> ](Hpsca) <sub>2</sub> ·1.26MeOH<br>(293 K)                                  | Co1-N15          | 2.107(3)   | N15-Co1-N15     | 90.82(18)  |
|                                                                                                    | Co1-N15          | 2.107(3)   | N15-Co1-N2      | 172.23(12) |
|                                                                                                    | Co1-N8           | 2.107(3)   | N15-Co1-N8      | 77.24(12)  |
|                                                                                                    | Co1-N8           | 2.107(3)   | N15-Co1-N8      | 95.25(12)  |

|           |         |            |             |            |
|-----------|---------|------------|-------------|------------|
|           | Co1-N2  | 2.118(3)   | N15-Co1-N2  | 172.23(12) |
|           | Co1-N2  | 2.118(3)   | N15-Co1-N2  | 96.71(12)  |
| 3 (100 K) | Fe1-O18 | 2.053(3)   | O18-Fe1-O22 | 85.20(11)  |
|           | Fe1-O22 | 2.125(3)   | O18-Fe1-O19 | 89.69(12)  |
|           | Fe1-O19 | 2.125(3)   | O22-Fe1-O19 | 169.97(11) |
|           | Fe1-N8  | 2.153(3)   | O18-Fe1-N8  | 170.22(11) |
|           | Fe1-N2  | 2.184(3)   | O22-Fe1-N8  | 99.07(11)  |
|           | Fe1-N14 | 2.222(3)   | O19-Fe1-N8  | 87.34(12)  |
| 4 (100 K) | Fe1-O2  | 1.8703(13) | O2-Fe1-O29  | 174.33(6)  |
|           | Fe1-O29 | 1.8860(13) | O2-Fe1-N21  | 93.46(6)   |
|           | Fe1-N21 | 1.9423(15) | O29-Fe1-N21 | 91.01(6)   |
|           | Fe1-N10 | 1.9570(16) | O2-Fe1-N10  | 89.69(6)   |
|           | Fe1-N17 | 2.0095(15) | O29-Fe1-N10 | 93.47(6)   |
|           | Fe1-N14 | 2.0221(15) | N21-Fe1-N10 | 94.20(7)   |

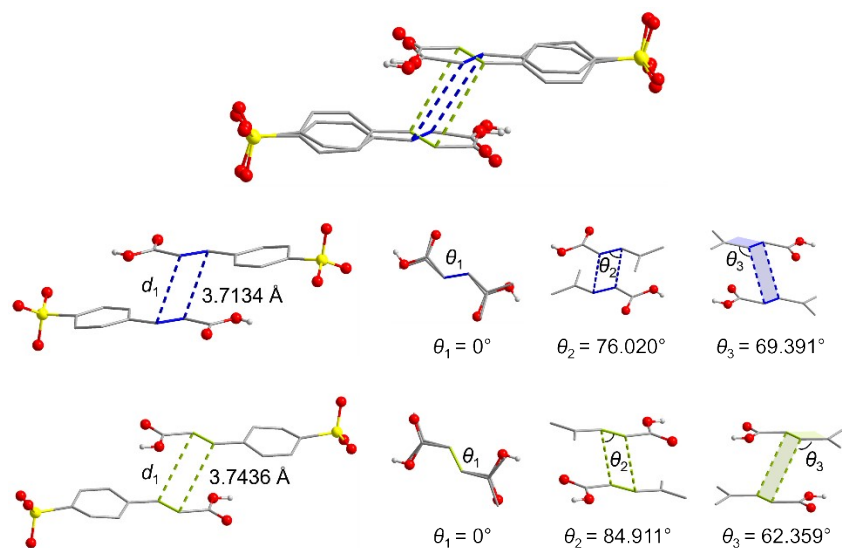

| Compounds                                                                                 | $d_1 / \text{Å}$  | $\theta_1 / ^\circ$ | $\theta_2 / ^\circ$ | $\theta_3 / ^\circ$ | Disorder |
|-------------------------------------------------------------------------------------------|-------------------|---------------------|---------------------|---------------------|----------|
| [Co(H <sub>2</sub> O) <sub>6</sub> ](Hpsca) <sub>2</sub> ·2H <sub>2</sub> O               | 3.7134            | 0                   | 76.020              | 69.391              | 0.38     |
|                                                                                           | 3.7436            | 0                   | 84.911              | 62.359              | 0.62     |
| [Co(H <sub>2</sub> O) <sub>6</sub> ](Hpsca) <sub>2</sub> ·4H <sub>2</sub> O               | 3.8287            | 0                   | 63.575              | 53.636              | 0.50     |
|                                                                                           | 4.2696            | 0                   | 86.608              | 81.082              | 0.50     |
| [Co(H <sub>2</sub> O) <sub>6</sub> ](Hpsca) <sub>2</sub> ·4H <sub>2</sub> O<br>(after UV) | 3.7780,<br>4.3924 | 12.756              | 86.147,<br>60.507   |                     | No       |
| <b>1</b>                                                                                  | 4.1059            | 0                   | 83.154              | 41.167              | 0.11     |
|                                                                                           | 4.0155            | 0                   | 59.085              | 88.057              | 0.89     |
| <b>2</b> (100 K)                                                                          | 3.9019            | 0                   | 59.432              | 85.429              | No       |
| <b>2</b> (r.t.)                                                                           | 4.2614            | 0                   | 83.191              | 43.847              | 0.37     |
|                                                                                           | 4.0788            | 0                   | 57.940              | 87.891              | 0.63     |
| <b>3</b> (100 K)                                                                          | 7.0922            | 0                   | 86.103              | 81.527              | No       |
| <b>4</b>                                                                                  | 7.7790            | 0                   | 55.612              | 57.153              | No       |

**Table S7.** Alignments of **Hpsca**<sup>-</sup> counter anion in the crystal lattice and related geometric parameters relevant to solid-state photoreactivity across all the complexes ( $d_1$  is defined by the distance between the parallel C=C bonds.  $\theta_1$  denotes the angle formed between two adjacent C=C bonds in the top view.  $\theta_2$  is defined by the angle involving the C=C bond and one of the carbon atoms from the adjacent C=C bond. The blue and green planes for  $\theta_3$  are defined by the two C=C bonds and their related single bond).

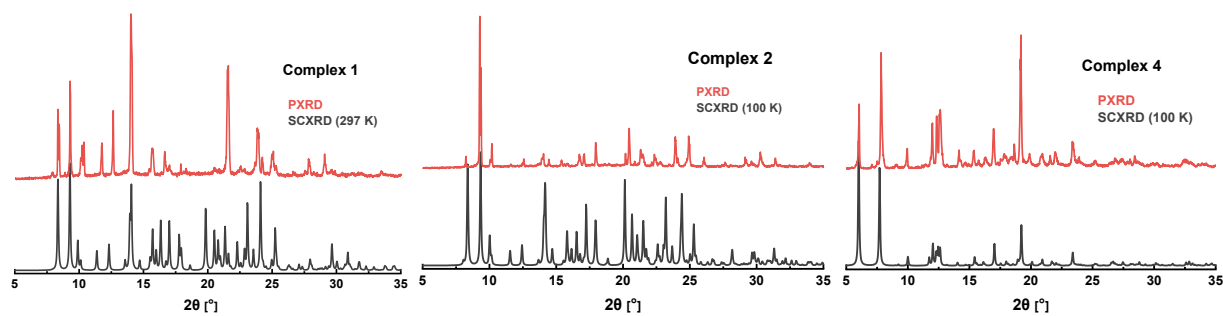

**Figure S1.** PXRD pattern of complexes **1**, **2** and **4** compared with the simulated pattern calculated from single-crystal X-ray diffraction (SCXRD) data (bottom).

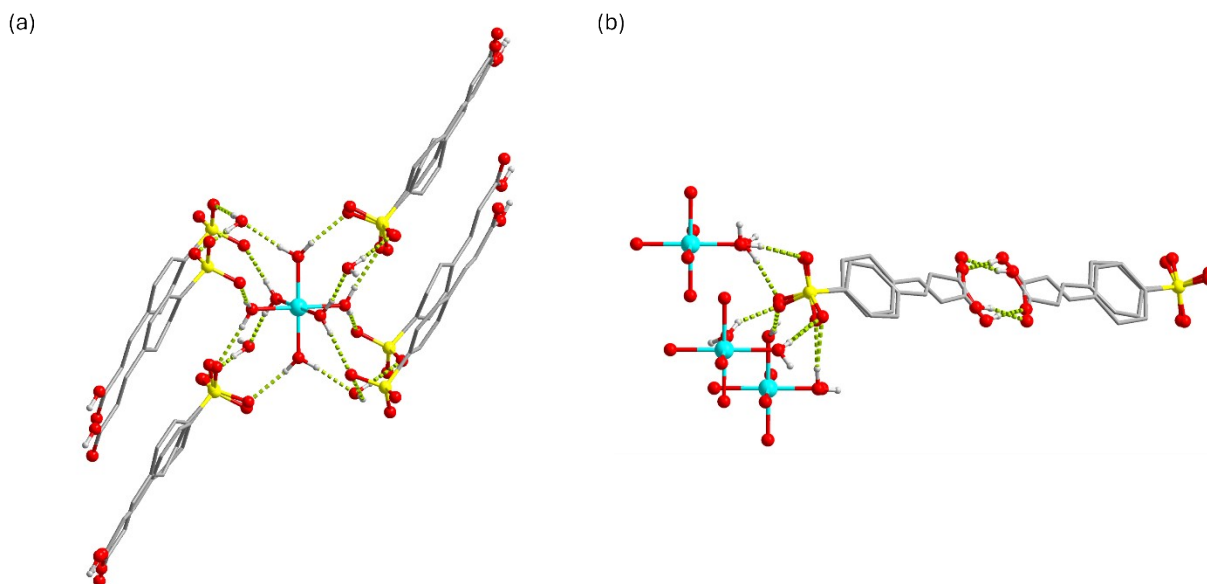

**Figure S2.** Hydrogen bonds around the  $[\text{Co}(\text{H}_2\text{O})_6]^{2+}$  ion (a) and *Hpsca*<sup>-</sup> anion (b) at r.t, in  $[\text{Co}(\text{H}_2\text{O})_6](\text{Hpsca})_2 \cdot 2\text{H}_2\text{O}$

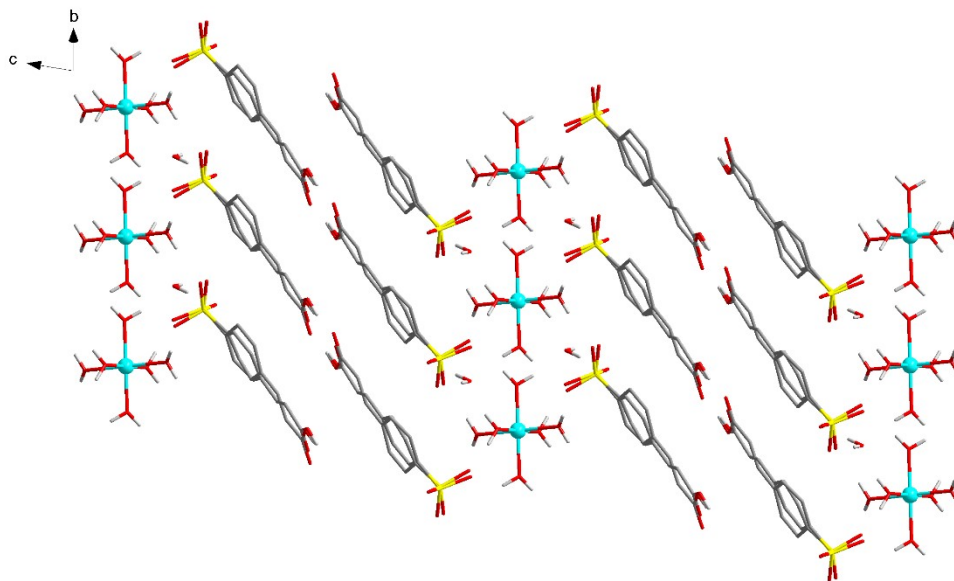

**Figure S3.** Crystal packing of  $[\text{Co}(\text{H}_2\text{O})_6](\text{Hpsca})_2 \cdot 2\text{H}_2\text{O}$  along the  $a$  axis at r.t.

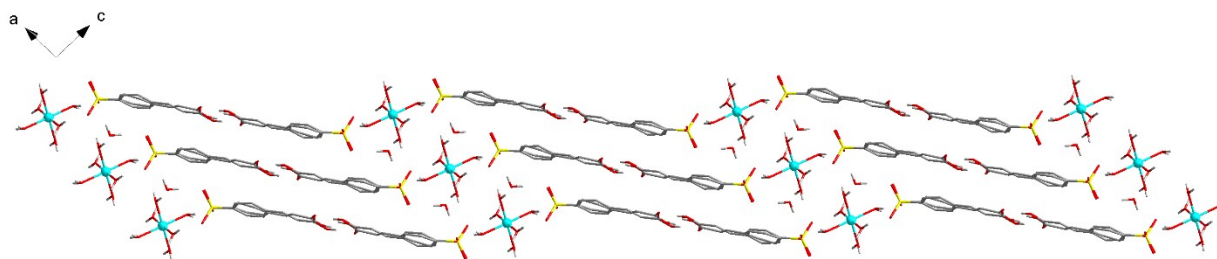

**Figure S4.** Crystal packing of  $[\text{Co}(\text{H}_2\text{O})_6](\text{Hpsca})_2 \cdot 2\text{H}_2\text{O}$  along the  $b$  axis at r.t.

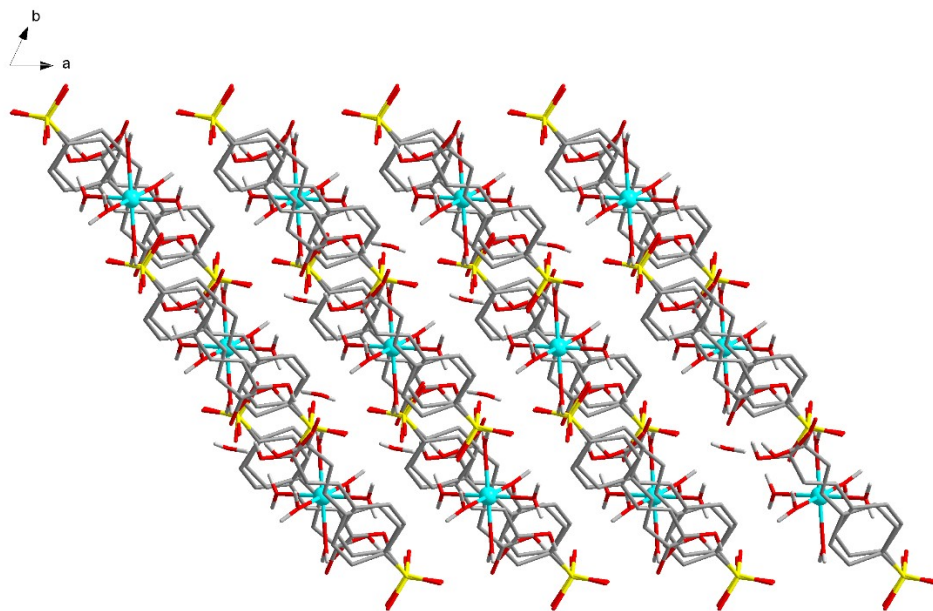

**Figure S5.** Crystal packing of  $[\text{Co}(\text{H}_2\text{O})_6](\text{Hpsca})_2 \cdot 2\text{H}_2\text{O}$  along the *c* axis at r.t.

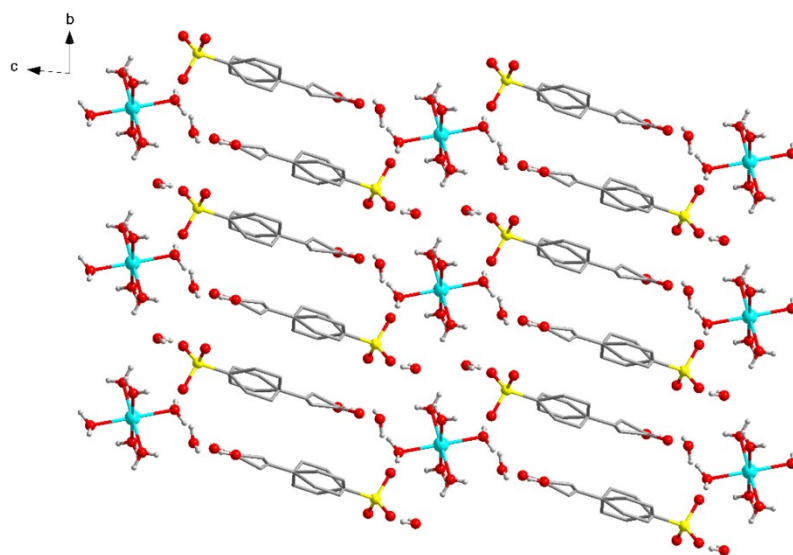

**Figure S6.** Crystal packing of  $[\text{Co}(\text{H}_2\text{O})_6](\text{Hpsca})_2 \cdot 4\text{H}_2\text{O}$  along the *a* axis at 150 K.

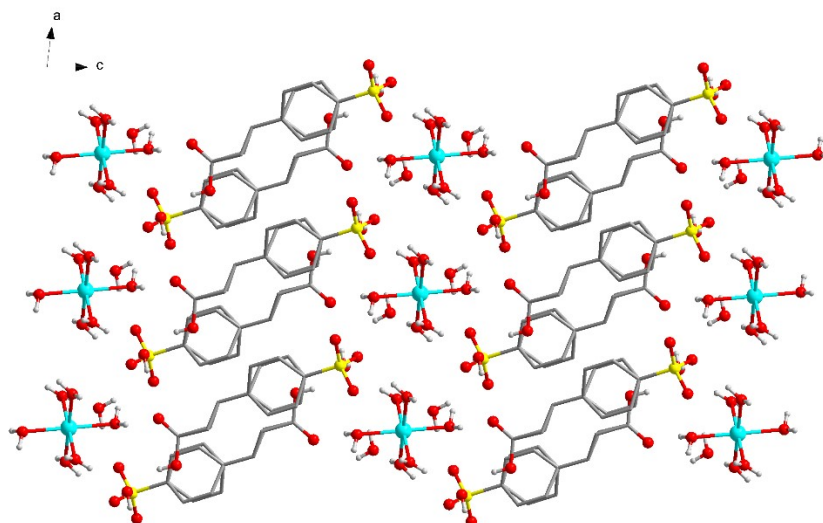

**Figure S7.** Crystal packing of  $[\text{Co}(\text{H}_2\text{O})_6](\text{Hpsca})_2 \cdot 4\text{H}_2\text{O}$  along the *b* axis at 150 K.

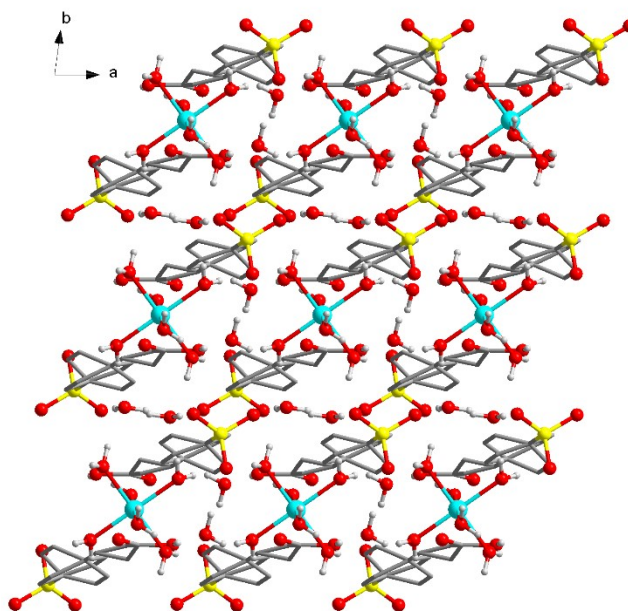

**Figure S8.** Crystal packing of  $[\text{Co}(\text{H}_2\text{O})_6](\text{Hpsca})_2 \cdot 4\text{H}_2\text{O}$  along the *c* axis at 150 K.

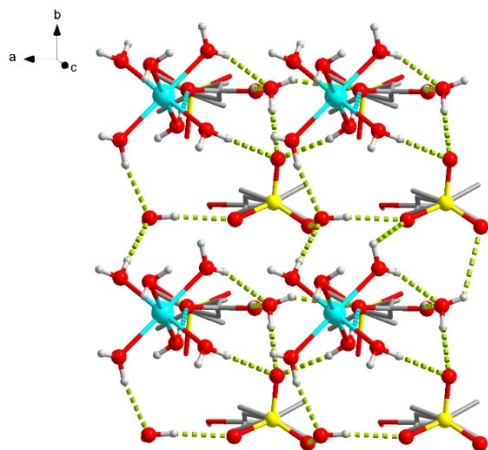

**Figure S9.** Hydrogen bonds around the  $[\text{Co}(\text{H}_2\text{O})_6]^{2+}$  ion in  $[\text{Co}(\text{H}_2\text{O})_6](\text{Hpsca})_2 \cdot 4\text{H}_2\text{O}$  at 150 K.

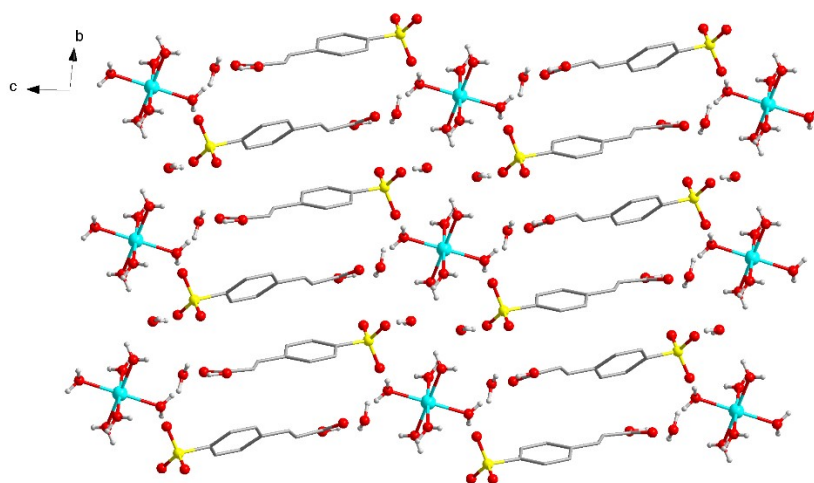

**Figure S10.** Crystal packing of  $[\text{Co}(\text{H}_2\text{O})_6](\text{Hpsca})_2 \cdot 4\text{H}_2\text{O}$  after irradiation along the  $a$  axis at r.t.

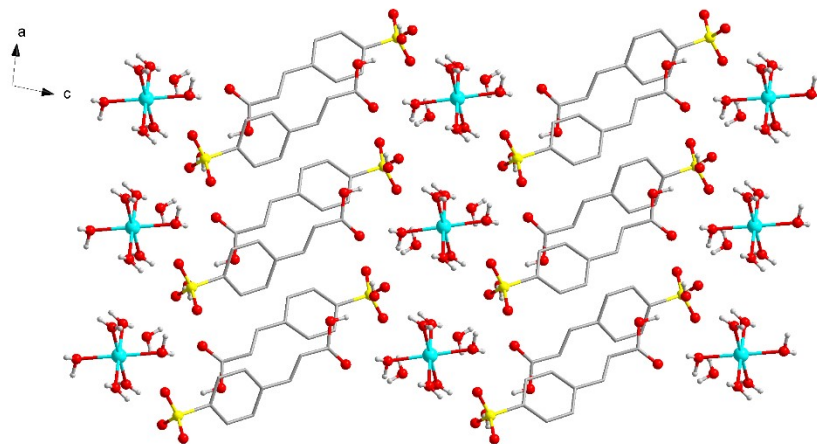

**Figure S11.** Crystal packing of [Co(H<sub>2</sub>O)<sub>6</sub>](Hpsca)<sub>2</sub>·4H<sub>2</sub>O after irradiation along the *b* axis at r.t.

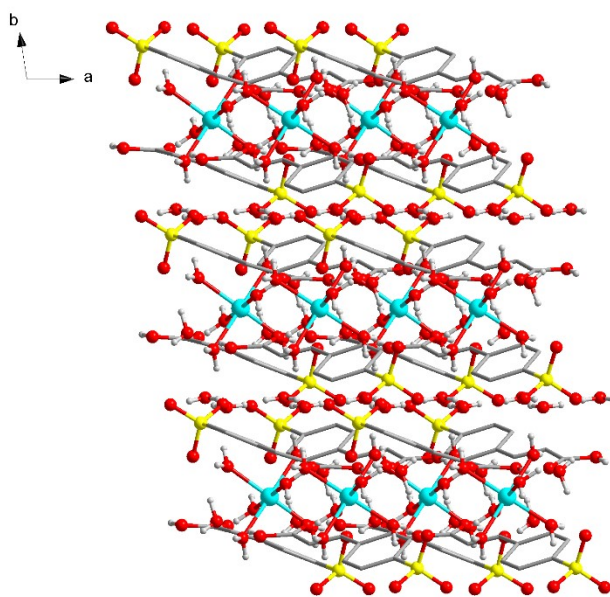

**Figure S12.** Crystal packing of [Co(H<sub>2</sub>O)<sub>6</sub>](Hpsca)<sub>2</sub>·4H<sub>2</sub>O after irradiation along the *c* axis at r.t.

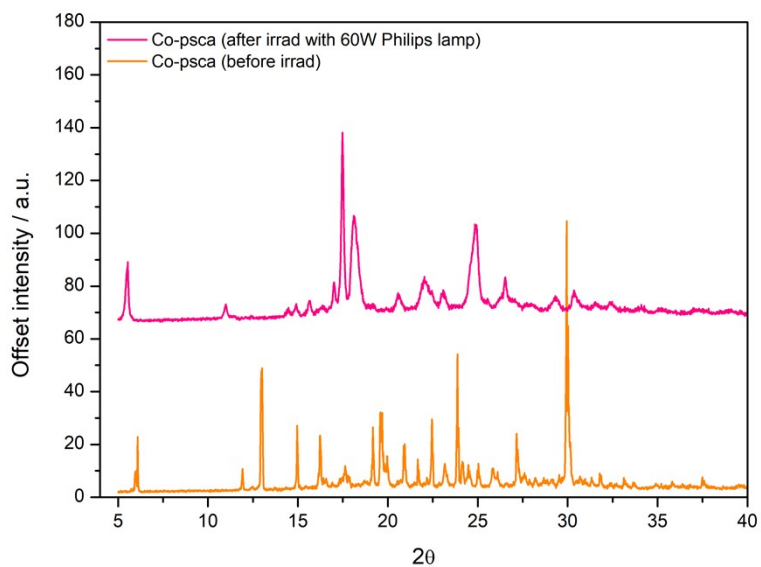

**Figure S13.** PXRD of  $[\text{Co}(\text{H}_2\text{O})_6](\text{Hpsca})_2 \cdot 4\text{H}_2\text{O}$  before and after photoirradiation.

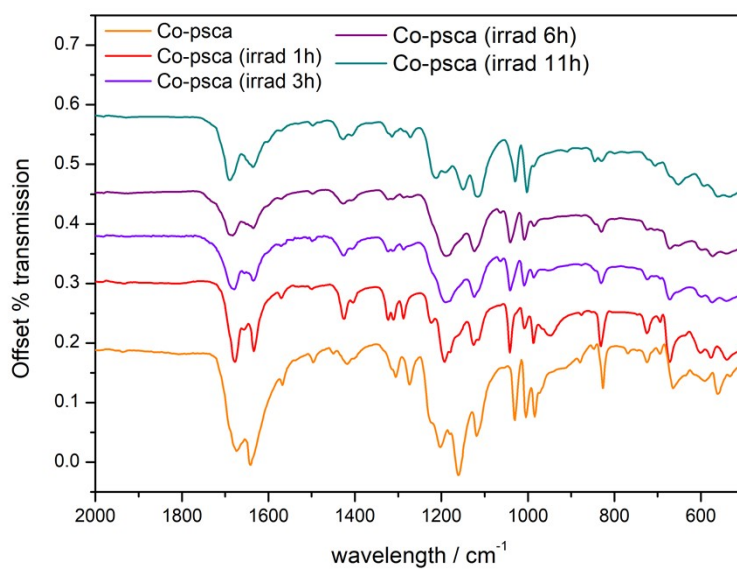

**Figure S14.** FTIR spectra of  $[\text{Co}(\text{H}_2\text{O})_6](\text{Hpsca})_2 \cdot 4\text{H}_2\text{O}$  after various hours of photoirradiation.

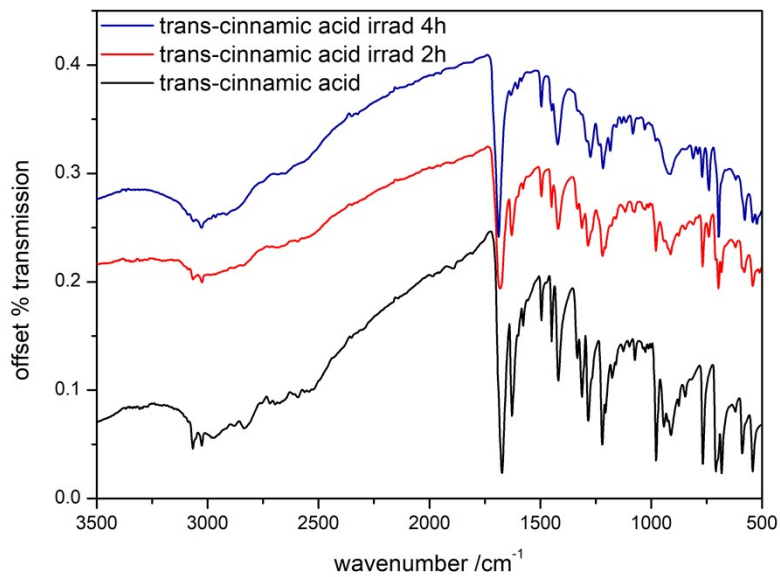

**Figure S15.** FTIR spectra of *trans*-cinnamic acid irradiated with UV light after 2 and 4 h illustrating the disappearance of the olefinic C=C bond at 1630  $\text{cm}^{-1}$ .

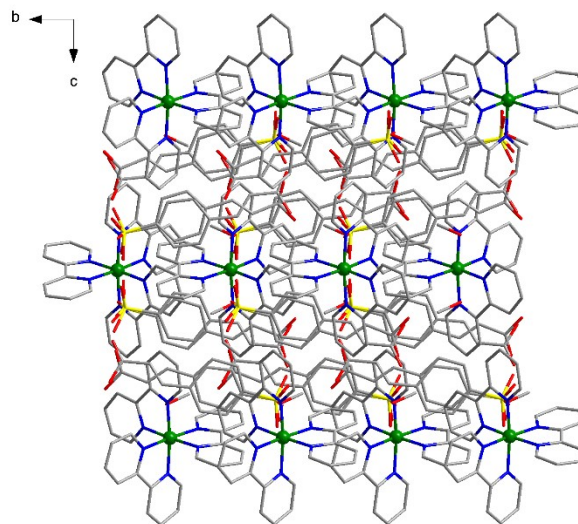

**Figure S16.** Crystal packing of  $[\text{Fe}(\text{bipy})_3](\text{Hpsca})_2 \cdot 2\text{MeOH}$  along the  $a$  axis at r.t.

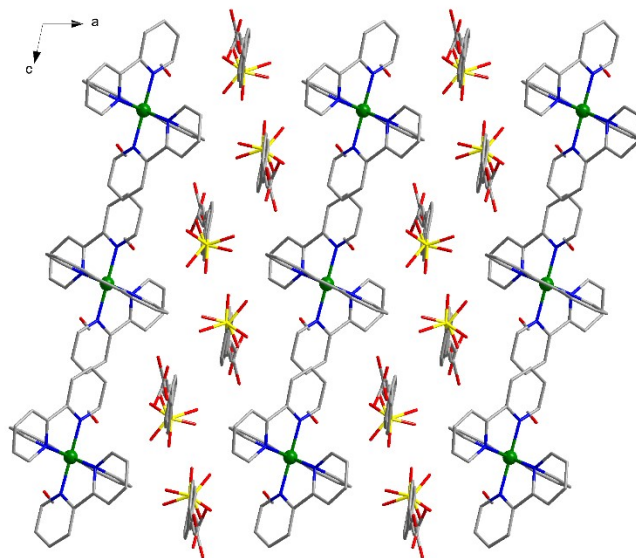

**Figure S17.** Crystal packing of [Fe(bipy)<sub>3</sub>](Hpsca)<sub>2</sub>·2MeOH along the *b* axis at r.t.

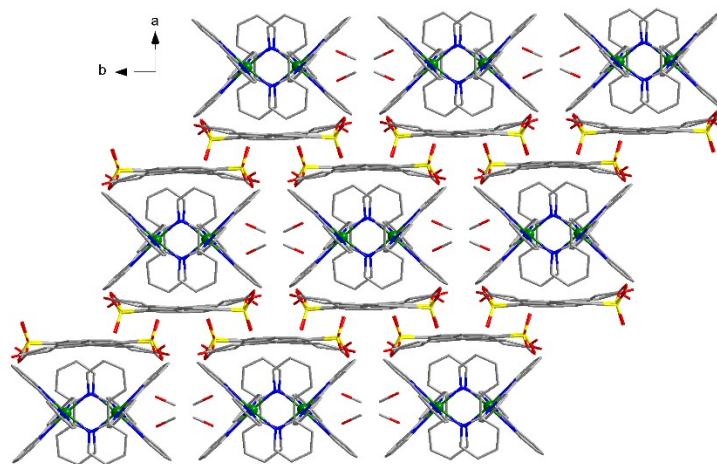

**Figure S18.** Crystal packing of [Fe(bipy)<sub>3</sub>](Hpsca)<sub>2</sub>·2MeOH along the *c* axis at r.t.



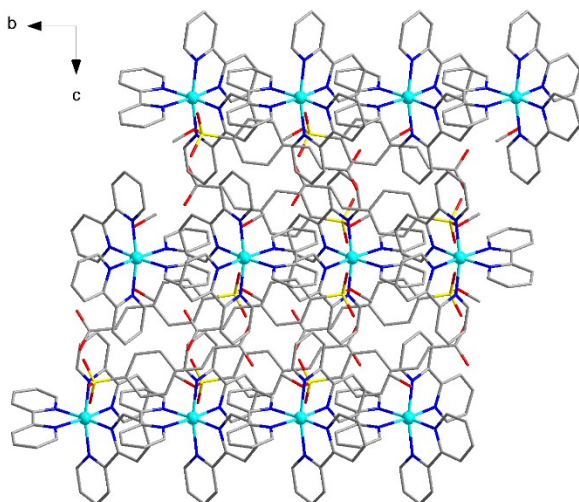

**Figure S20.** Crystal packing of [Co(bipy)<sub>3</sub>](Hpsca)<sub>2</sub>·2MeOH along the *a* axis at 100 K.

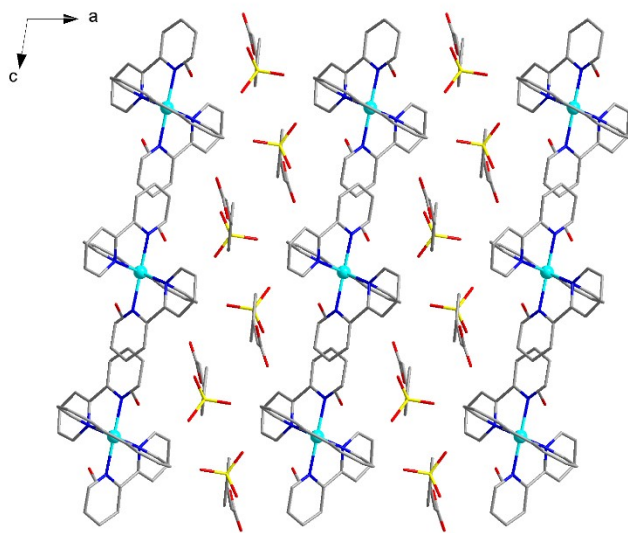

**Figure S21.** Crystal packing of [Co(bipy)<sub>3</sub>](Hpsca)<sub>2</sub>·2MeOH along the *b* axis at 100 K.

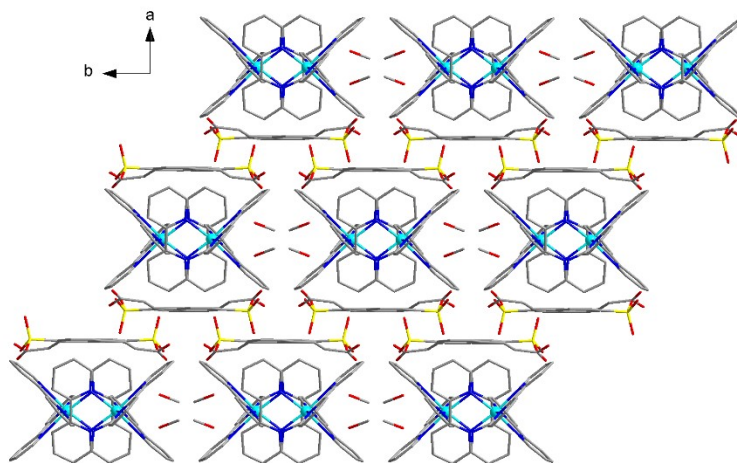

**Figure S22.** Crystal packing of [Co(bipy)<sub>3</sub>](Hpsca)<sub>2</sub>·2MeOH along the *c* axis at 100 K.

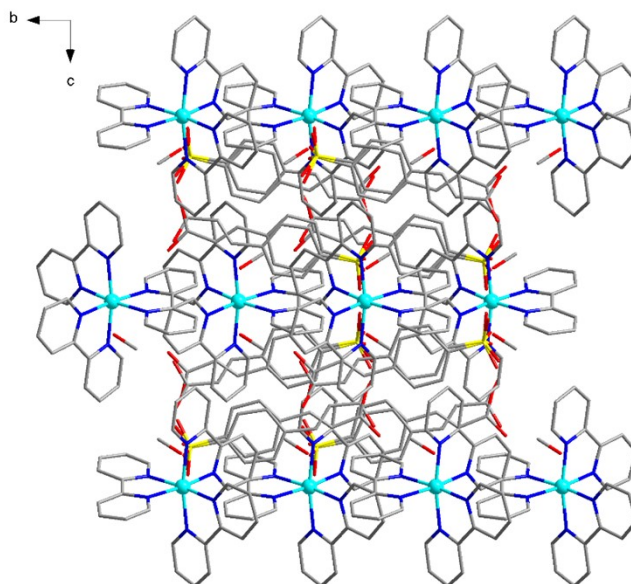

**Figure S23.** Crystal packing of [Co(bipy)<sub>3</sub>](Hpsca)<sub>2</sub>·1.26MeOH along the *a* axis at r.t.

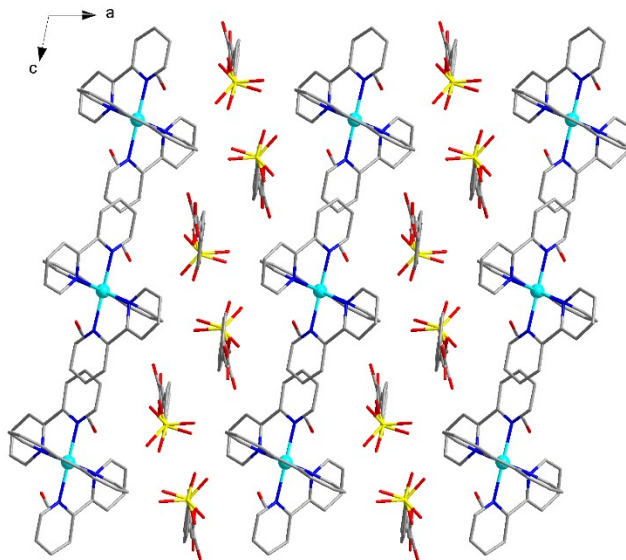

**Figure S24.** Crystal packing of [Co(bipy)<sub>3</sub>](Hpsca)<sub>2</sub>·1.26MeOH along the *b* axis at r.t.

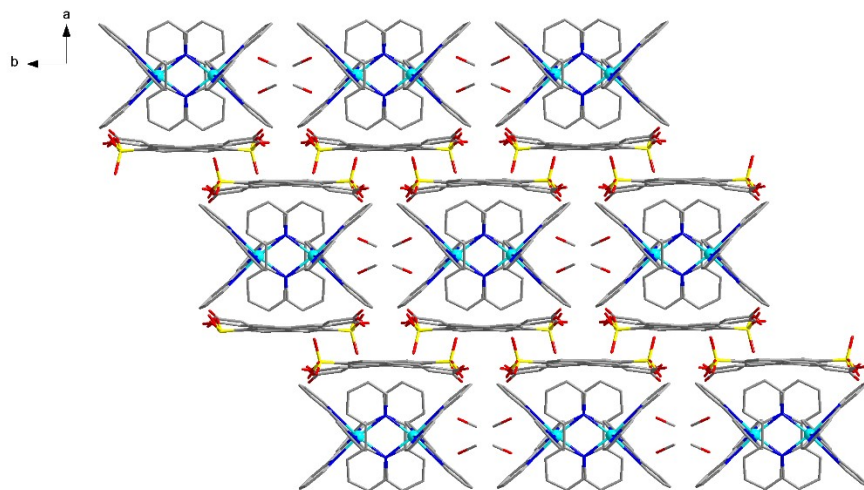

**Figure S25.** Crystal packing of [Co(bipy)<sub>3</sub>](Hpsca)<sub>2</sub>·1.26MeOH along the *c* axis at r.t.

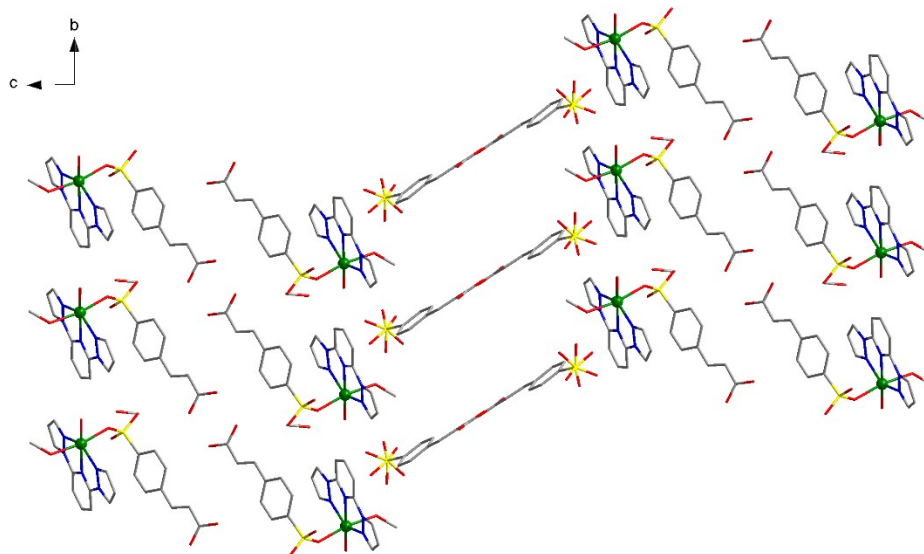

**Figure S26.** Crystal packing of  $[\text{Fe}(1\text{-bpp})(\text{Hpsca})(\text{H}_2\text{O})(\text{MeOH})]\text{Hpsca}\cdot\text{MeOH}$  along the *a* axis at r.t..

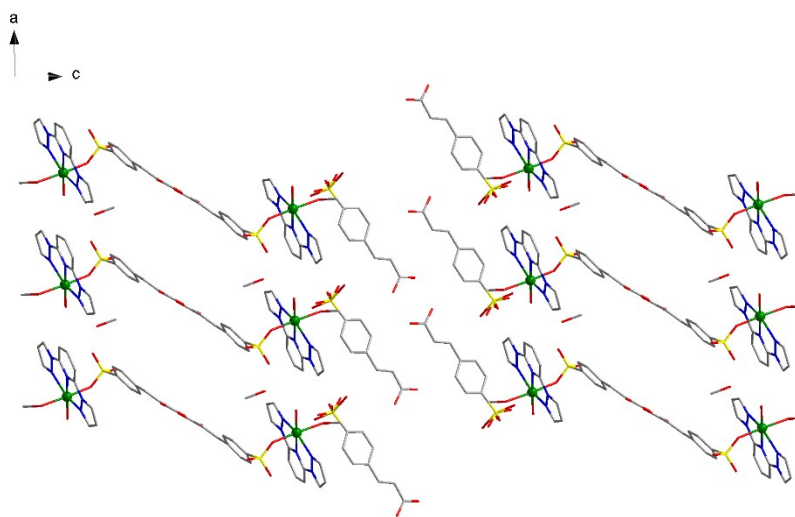

**Figure S27.** Crystal packing of  $[\text{Fe}(1\text{-bpp})(\text{Hpsca})(\text{H}_2\text{O})(\text{MeOH})]\text{Hpsca}\cdot\text{MeOH}$  along the *b* axis at r.t..

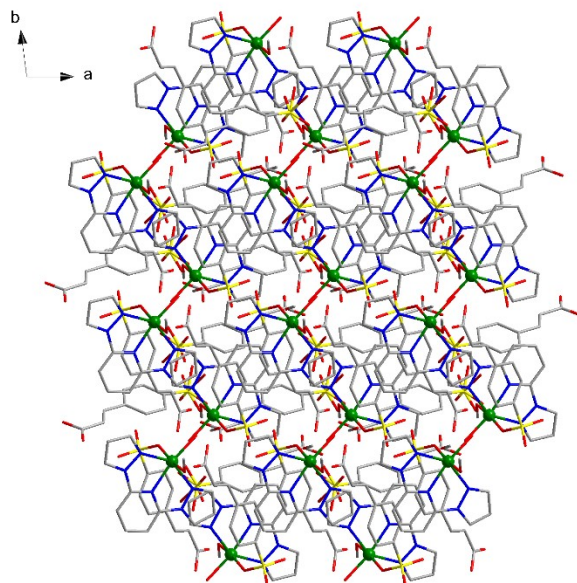

**Figure S28.** Crystal packing of  $[\text{Fe}(1\text{-bpp})(\text{Hpsca})(\text{H}_2\text{O})(\text{MeOH})]\text{Hpsca}\cdot\text{MeOH}$  along the  $c$  axis at r.t..

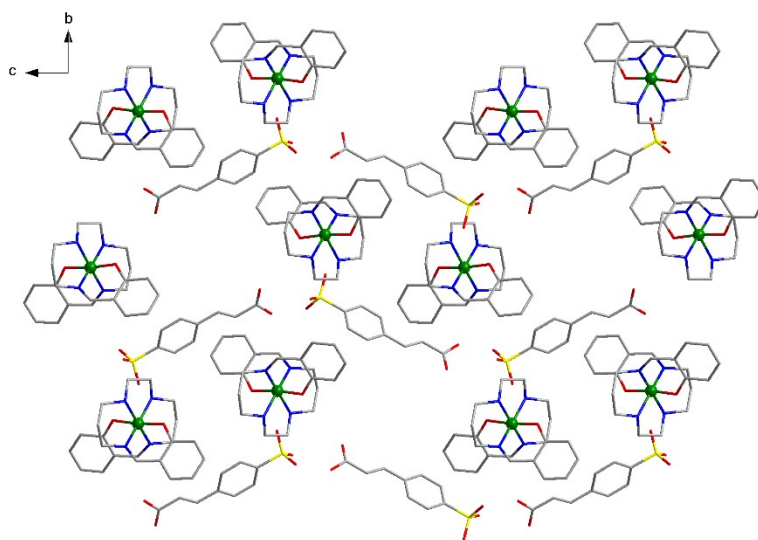

**Figure S29.** Crystal packing of  $[\text{Fe}(3,2,3\text{-sal}_2\text{tet})]\text{Hpsca}\cdot\text{H}_2\text{O}$  along the  $a$  axis at 100 K.

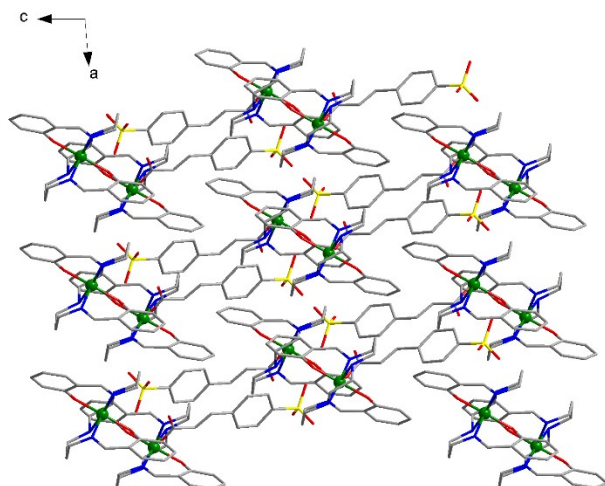

**Figure S30.** Crystal packing of [Fe(3,2,3-sal<sub>2</sub>tet)]Hpsca·H<sub>2</sub>O along the *b* axis at 100 K.

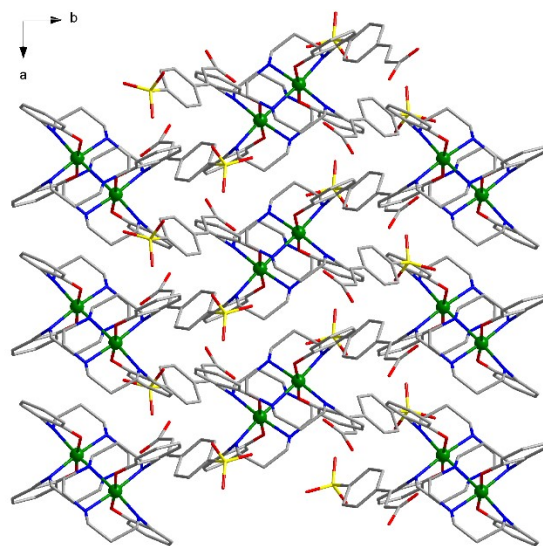

**Figure S31.** Crystal packing of [Fe(3,2,3-sal<sub>2</sub>tet)]Hpsca·H<sub>2</sub>O along the *c* axis at 100 K.

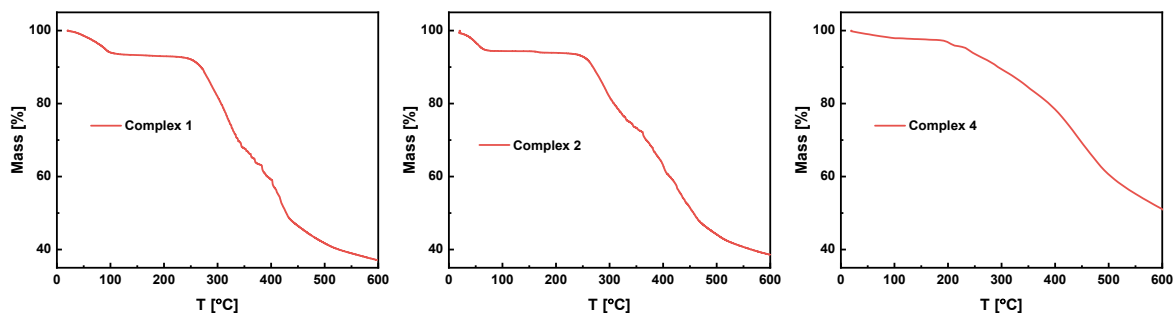

**Figure S32.** TGA curves of complexes **1**, **2** and **4**. **1** shows an initial weight loss of about 6.0% below 100 °C, which corresponds to the release of ca. 2 methanol molecules per formula unit. **2** exhibits a weight loss of ca. 5.5%, consistent with the removal of ca. 1.8 methanol molecule. **4** displays a weight loss of about 2.0%, which can be assigned to the release of ca. one water molecule.

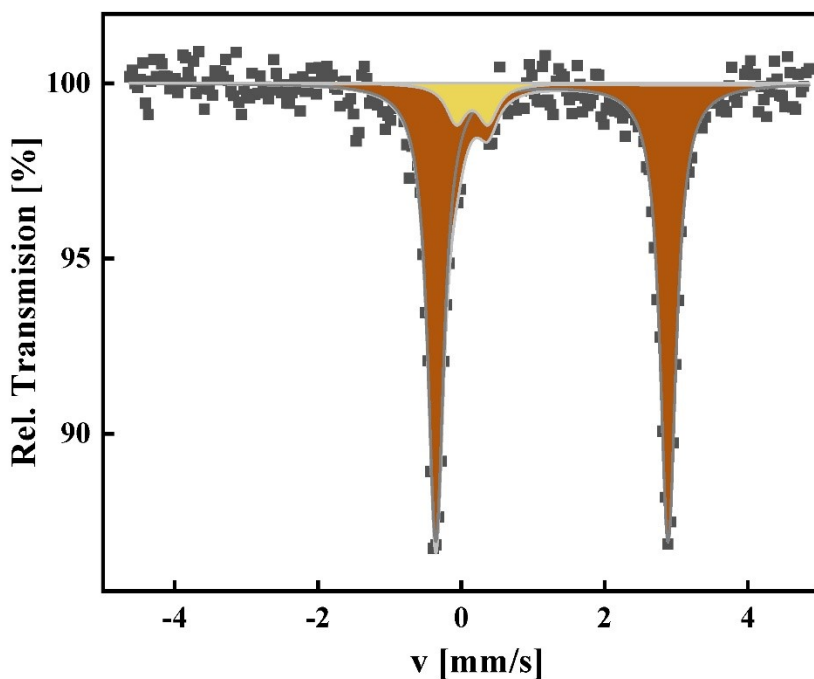

**Figure S33.**  $^{57}\text{Fe}$  Mössbauer spectrum of  $[\text{Fe}(\text{H}_2\text{O})_6](\text{HpscA})_2 \cdot 2\text{H}_2\text{O}$  recorded at 298 K. The signal in red stands for HS Fe(II) ions and in yellow for HS Fe(III) ions.

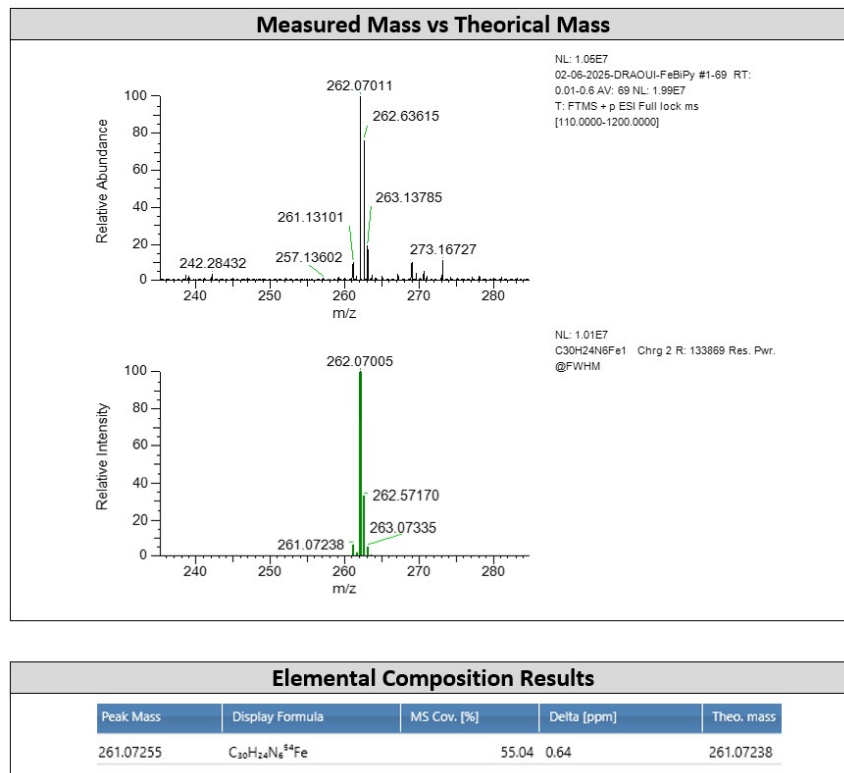

**Figure S34. HRMS of 1.**

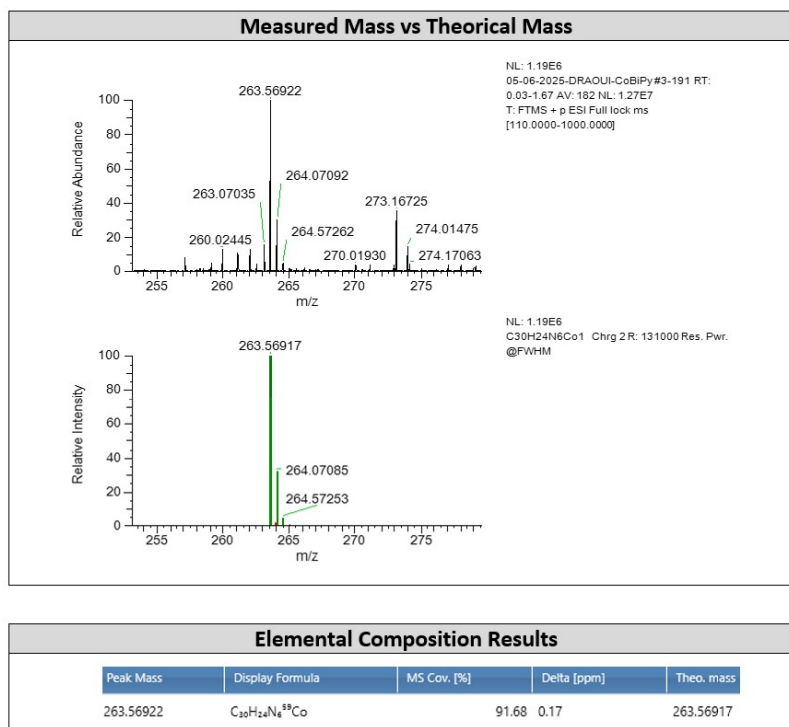

**Figure S35. HRMS of 2.**

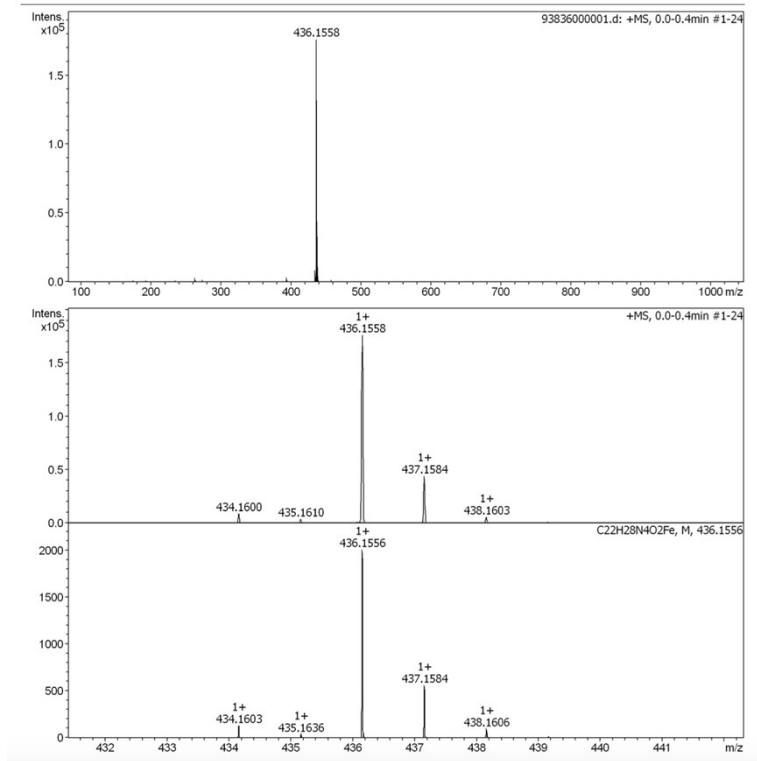

**Figure S36.** HRMS of 4.
